# Supplementary material
Source: publisher site journal article supplement (https://www.spandidos-publications.com/413/downloadSupplementary)

Figure S1. (A) Luciferase activity of an NF- $\kappa$ B-luciferase reporter plasmid in TAGLN2-expressing 293T cells, measured 4 h after stimulation with different concentrations of TNF $\alpha$ , presented relative to the activity of *Renilla* luciferase. Data shown were representative of three independent experiments. (B) Immunoblotting of TAGLN2, p100, p65/RelA, p50 and I $\kappa$ B expression in human breast cancer cell lines. Lamin B1 was used as nuclear loading control for nuclear p65/RelA expression. Western blots were representative of three independent experiments. (C) Pearson correlation analysis of TAGLN2 and p65 expression levels in breast cancer cell lines ( $R=-0.444$ ,  $P=0.199$ ,  $n=10$ ). NF- $\kappa$ B, nuclear factor- $\kappa$ B; TAGLN2, transgelin 2; TNF $\alpha$ , tumor necrosis factor  $\alpha$ .

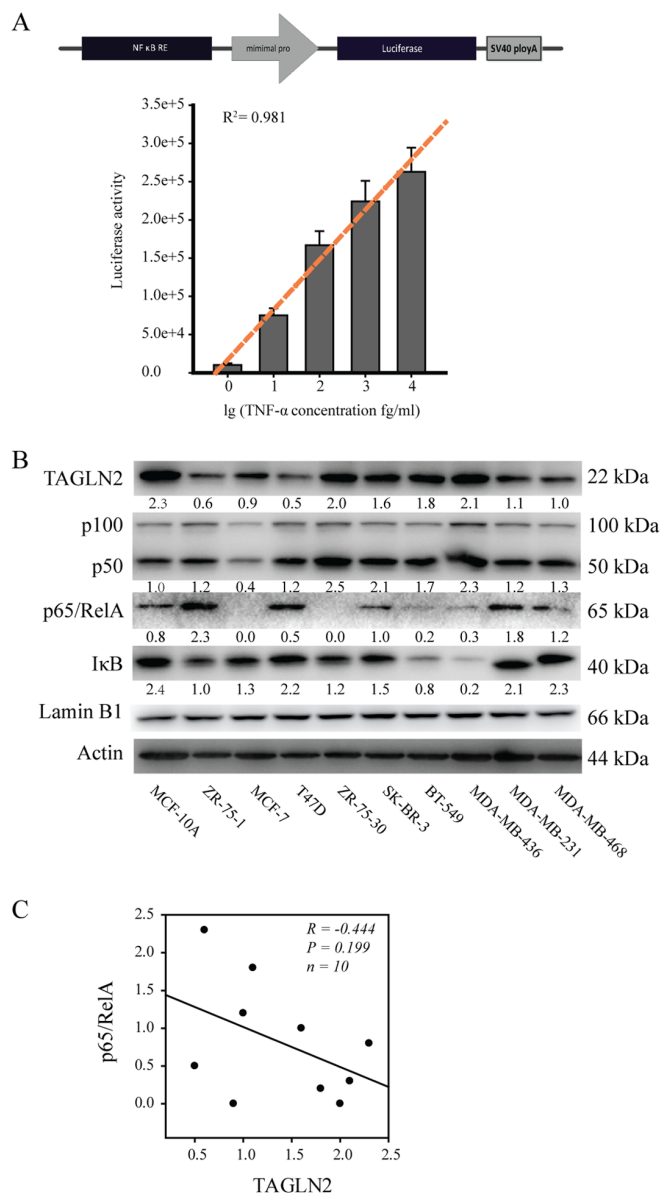

Supplement: Supplementary file 1 [file downloadSupplementary]
